# Supplementary material
Source: PubMed Central journal article supplement (PMC6771269)

Lean

MetS

Lean+RAS

MetS+RAS

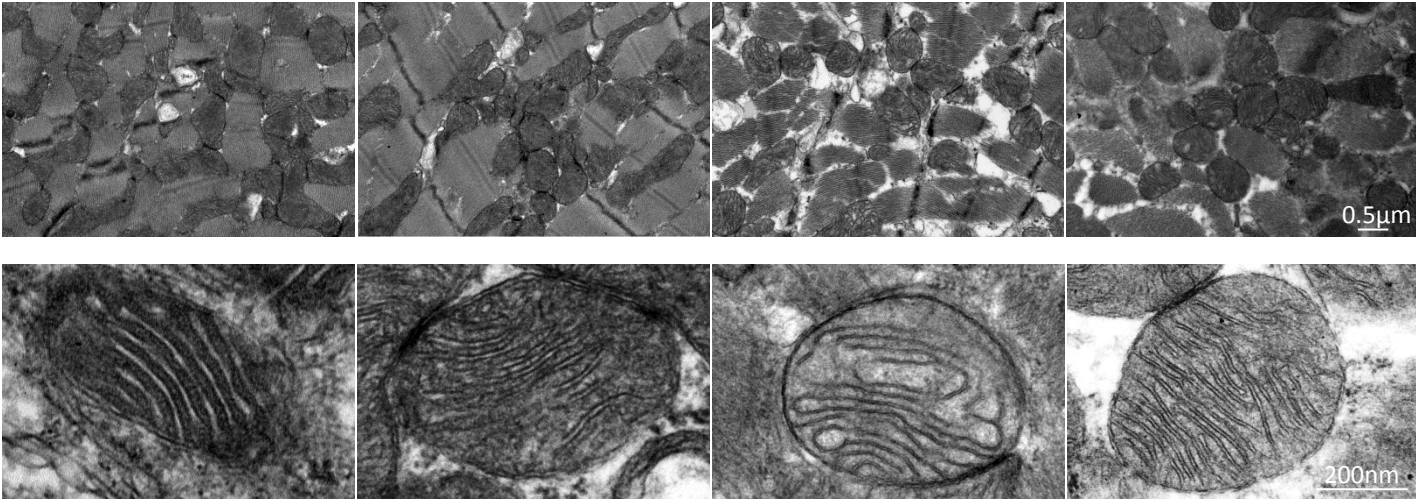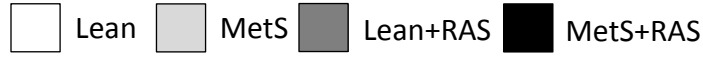

Mitochondrial Density  
(Number of mitochondria/field)

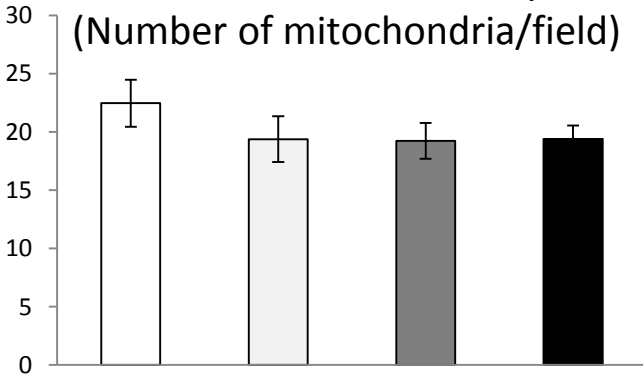

Area (Arbitrary units)

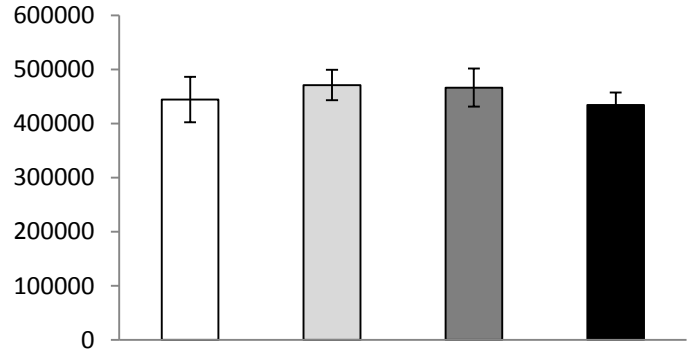

Perimeter (Arbitrary units)

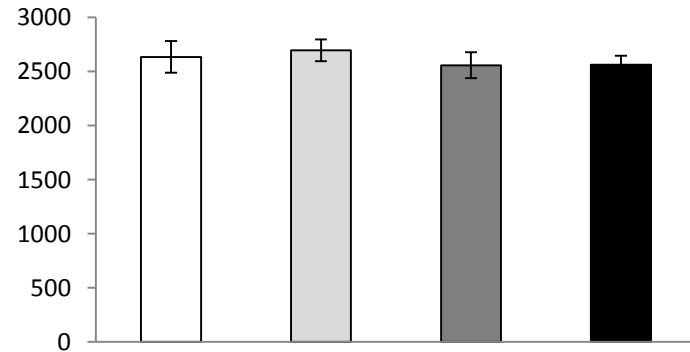

Matrix Density (Arbitrary units)

♣ Ischemia

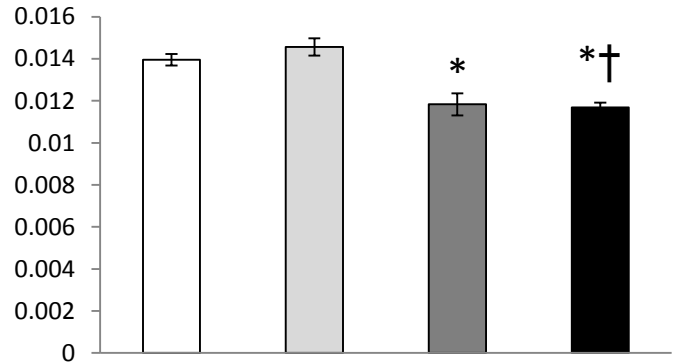

Supplement: NIHMS1052455-supplement-S3.pdf [file NIHMS1052455-supplement-S3.pdf]
