# Supplementary material
Source: PubMed Central journal article supplement (PMC6771269)

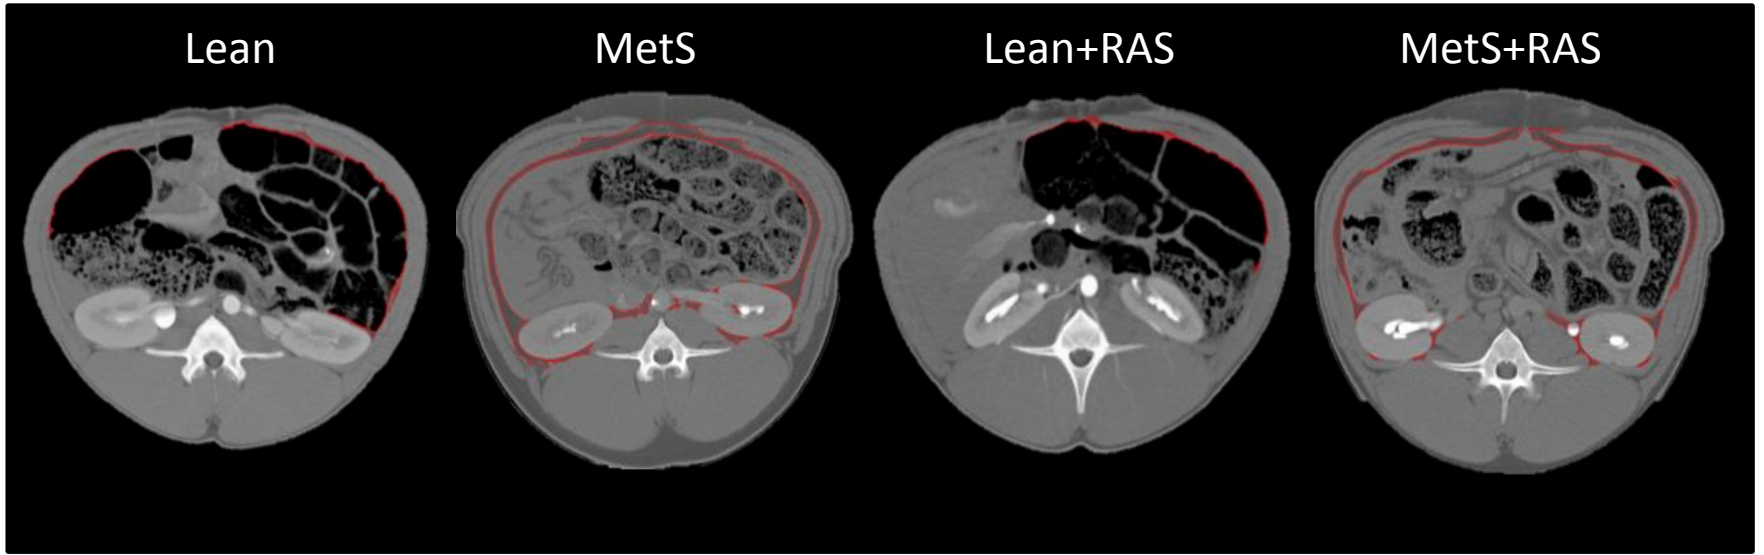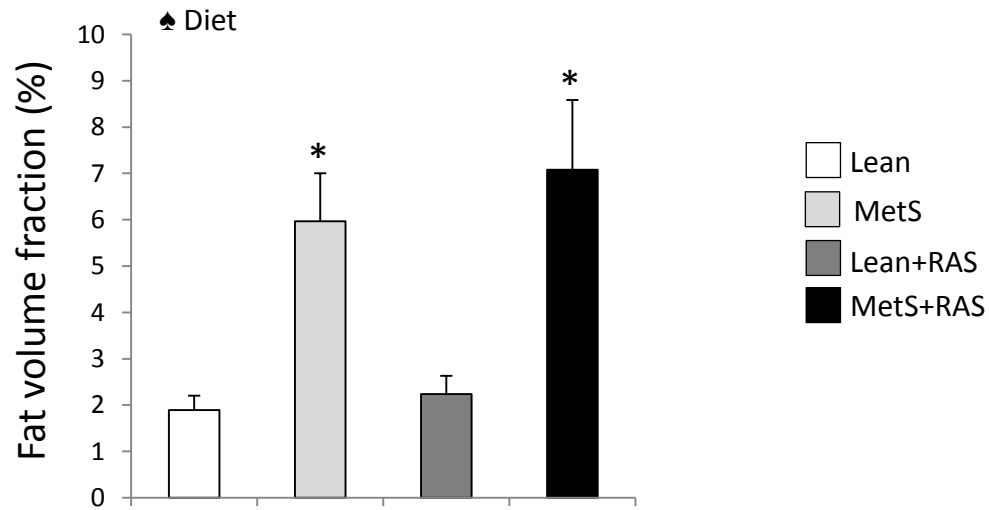

Supplement: NIHMS1052455-supplement-S1.pdf [file NIHMS1052455-supplement-S1.pdf]

**Fig S2**

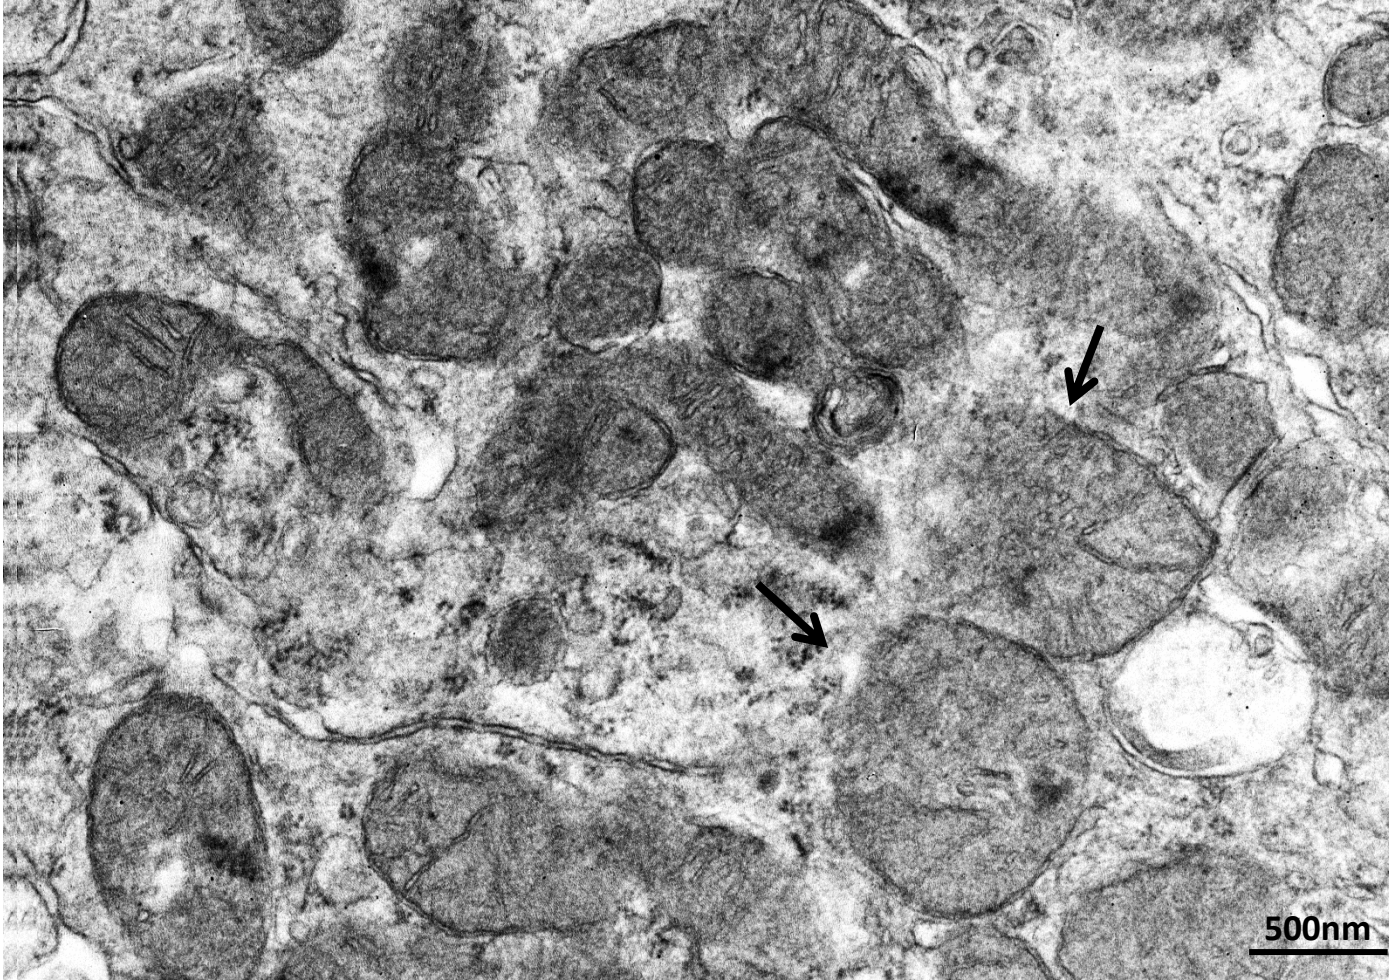

Supplement: NIHMS1052455-supplement-S2.pdf [file NIHMS1052455-supplement-S2.pdf]
